# Supplementary material for: Tetraspanin CD9 is a conserved receptor for rhabdoviruses across multiple genera
Source: Research Square preprint supplement (doi:10.21203/rs.3.rs-7515469/v1), 2025-09-18
Supplement: Supplementary file 1 [file 051e5089bd8fc6b1cdac880e.docx]

### Extended Data Fig. 1


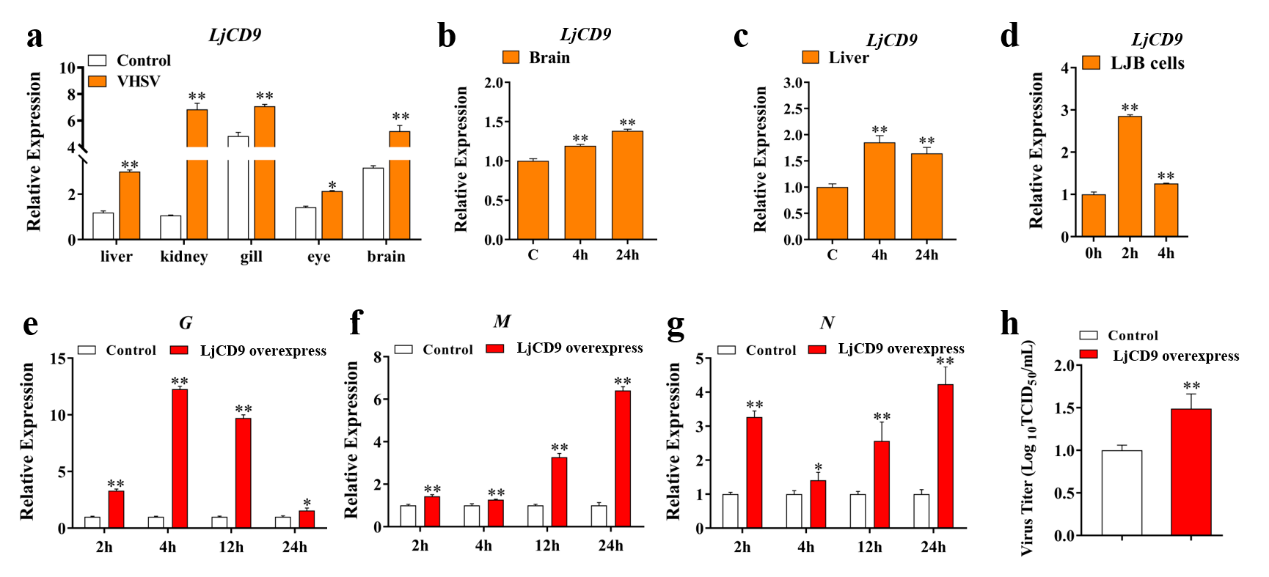


**Extended Data Fig. 1. LjCD9 is associated with VHSV infection.** (**a**) RT-qPCR analysis of *LjCD9* mRNA expression in VHSV-infected sea perch tissues at 24 hpi. (**b-c**) Temporal expression profiles of *LjCD9* mRNA in the brain (**b**) and liver (**c**) following VHSV infection, compared to the PBS-injected control group at at 4 and 24 hpi. (**d**) RT-qPCR analysis of *LjCD9* mRNA expression in VHSV-infected LJB cells at 0, 2, and 4 hpi. (**e-g**) RT-qPCR analysis of VHSV *G*, *M*, and *N* RNA in LjCD9-overexpressing LJB cells following inoculation with VHSV, relative to Flag-tag transfected control cells at 2, 4, 12 and 24 h. (h) Viral titers in supernatants of LjCD9-overexpressing LJB cells post-VHSV infection for 24 h. **, *p*＜0.01.

**Extended Data Fig. 2**


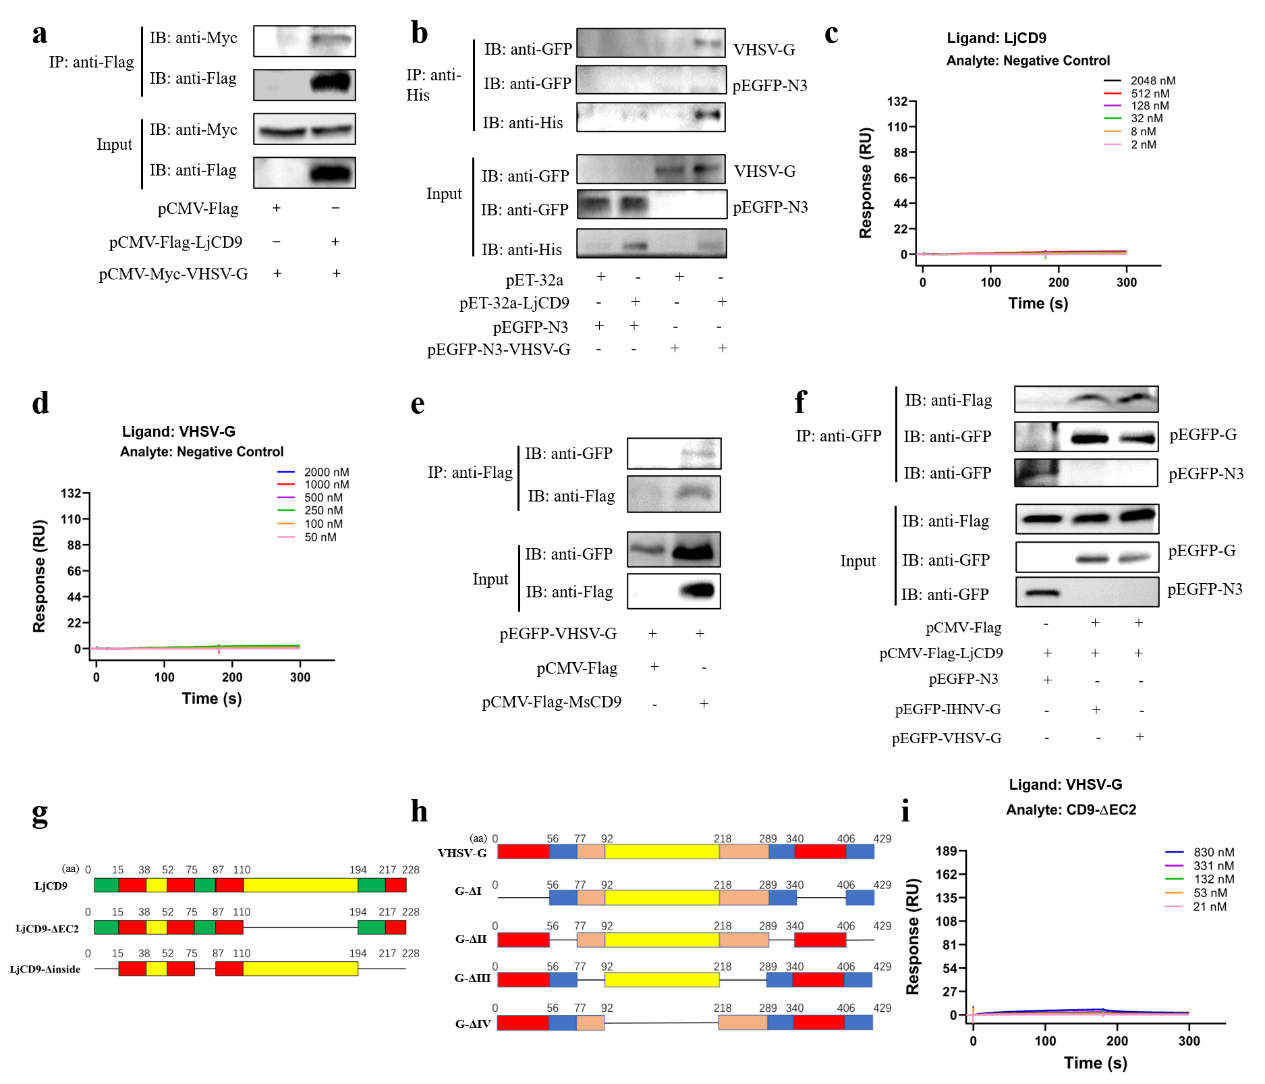


**Extended Data Fig. 2****. Direct interaction between LjCD9 and VHSV G protein.** (**a**) Co-IP of LjCD9 and VHSV G protein. HEK293T cells were transfected with various plasmids as indicated. The cell lysates were then subjected to immunoprecipitation using anti-Flag magnetic beads followed by western blot analysis. (**b**) LjCD9 pulls down VHSV G. The lysates of HEK293T cells transfected with indicated plasmids were pulled down with purified His-LjCD9 or His proteins using anti-His magnetic beads. The proteins directly bound to LjCD9 were immunoblotted with anti-His and anti-Flag antibodies, respectively. (**c-d**) SPR negative control assays. His-tagged protein was passed over immobilized LjCD9 (c) or VHSV G (d) on a CM5 sensor chip to confirm non-specific binding. (**e**) Co-IP of VHSV G with MsCD9 (*Micropterus salmoides* CD9). Lysates from HEK293T cells transfected with Flag-MsCD9 and pEGFP-G plasmids were subjected to immunoprecipitation with anti-Flag antibody. (**f**) Co-IP of LjCD9 with IHNV G or VHSV G. HEK293T cells transfected with Flag-LjCD9 and GFP-IHNV G/VHSV G plasmids were immunoprecipitated with anti-GFP beads to compare binding specificity. (**g-h**) Schematic diagrams of LjCD9 (**g**) and VHSV G (**h**) truncation mutants. (**i**) SPR analysis of LjCD9-ΔEC2 mutant binding to immobilized VHSV G. VHSV G protein was coupled to a CM5 chip, and LjCD9-ΔEC2 protein was passed at the indicated concentrations. Data are representative of three independent experiments.

### Extended Data Fig. 3


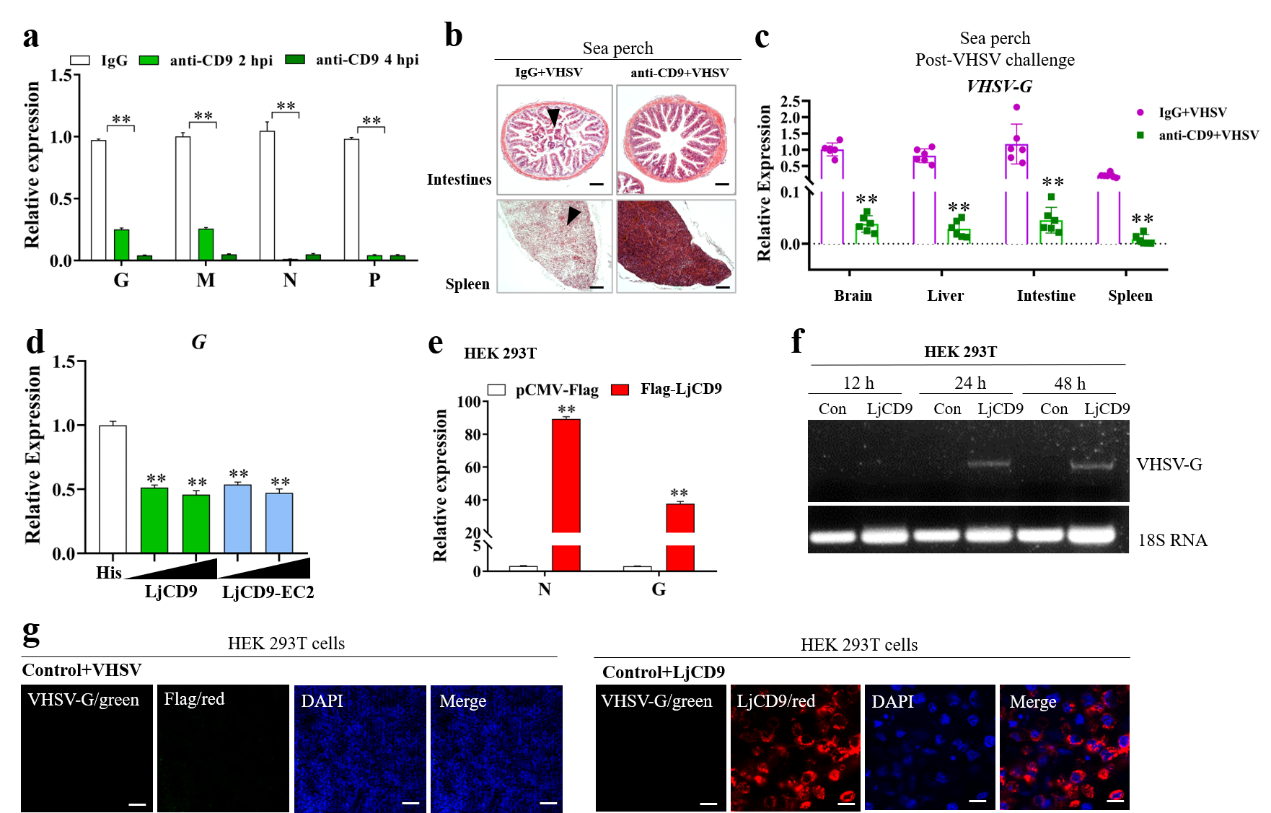


**Extended Data Fig. 3. LjCD9 serves as a functional receptor for VHSV entry.** (**a**) RT-qPCR analysis of VHSV *G*, *M*, *N*, and *P* mRNA in LJB cells pre-treated with anti-human CD9 antibody (1:50) for 4 h, followed by VHSV infection at 28°C for 2 or 4 h. (**b**) Histopathological sections of intestine and spleen from sea perch treated with VHSV + PBS or anti-CD9 antibody. Bar=100 μm. (**c**) RT-qPCR quantification of VHSV *G* mRNA in brain, liver, intestine, and spleen tissues from sea perch treated as in (b). **, *p*＜0.01. (**d**) Blocking assay of VHSV entry by His-LjCD9 and His-LjCD9-EC2 proteins. VHSV was pre-incubated with His-LjCD9 (100 or 500 ng), His-LjCD9-EC2 (100 or 500 ng), or His protein (500 ng) at 4°C for 4 h, then added to LJB cells for 4 h; VHSV G expression was detected by RT-qPCR. (**e**) RT-qPCR analysis of VHSV *G* and *N* mRNA in LjCD9-overexpressing HEK293T cells infected with VHSV for 4 h at 28°C. (**f**) RT-PCR detection of VHSV G bands in LjCD9-overexpressing HEK293T cells post-VHSV infection, washed to remove unbound virus, and incubated for 12, 24 or 48 h. (**g**) Immunofluorescence staining of VHSV-infected HEK293T cells transfected with Flag-LjCD9 or empty vector. VHSV G (green) and LjCD9 (red) were detected with specific antibody; nuclei stained with DAPI. Bar=10 μm. n=4 biological replicates, 3000 cells analyzed per replicate. Data are representative of three independent experiments.

### Extended Data Fig. 4


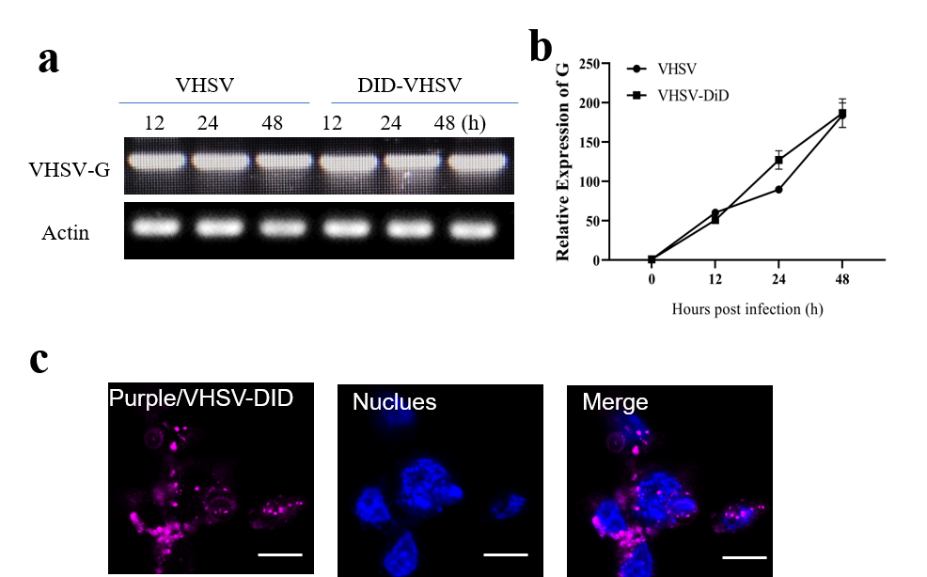


**Extended Data Fig. 4. Characterization of DiD-labeled VHSV.** (**a**) RT-PCR detection of VHSV-G expression in VHSV and VHSV-DID infected LJB cells at 12, 24 and 48 hpi. (**b**) RT-qPCR analysis of VHSV *G* mRNA in VHSV and VHSV-DID infected LJB cells at 12, 24 and 48 hpi. (**c**) Fluorescence microscopy of DiD-labeled VHSV (purple) in infected LJB cells; nuclei stained with DAPI (blue). Bar=10 μm.

### Extended Data Fig. 5


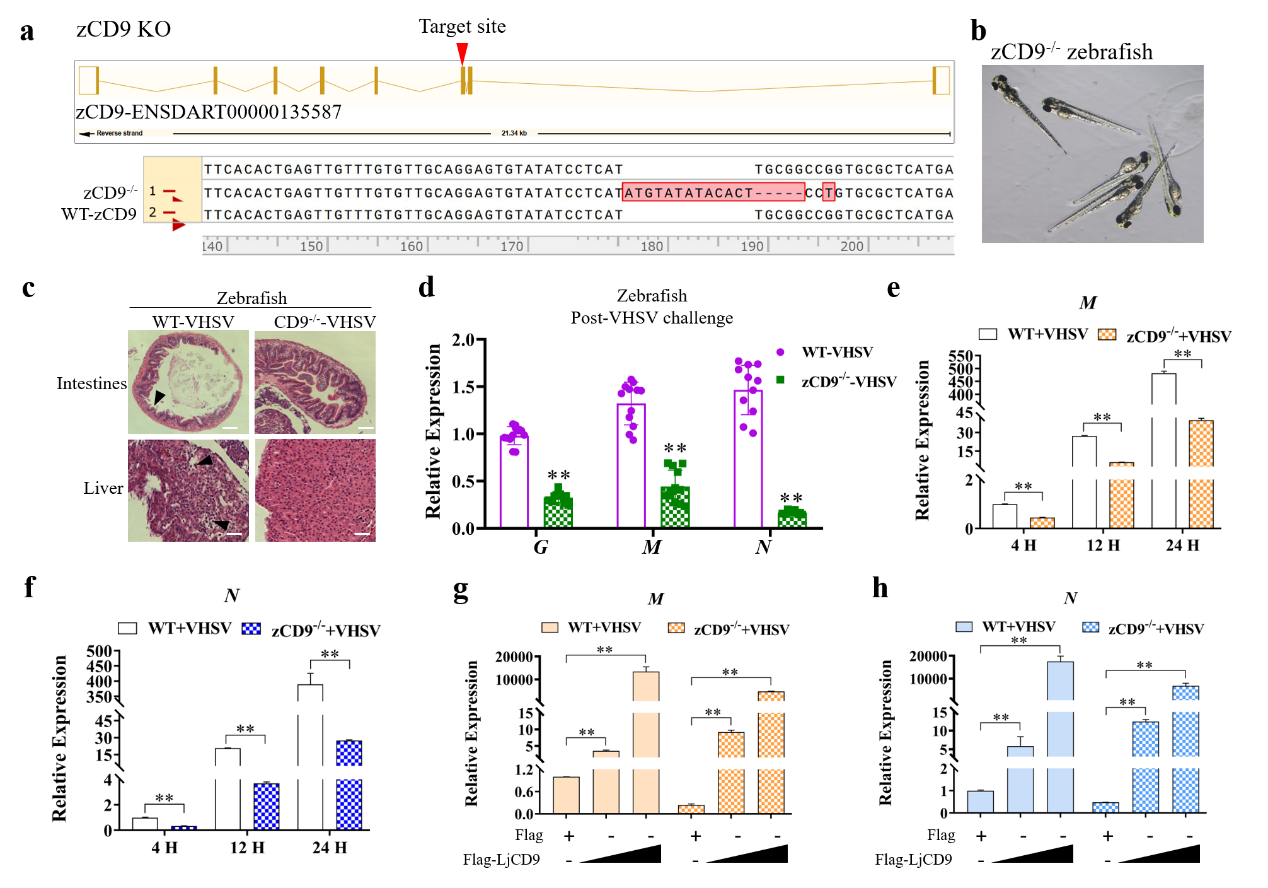


**Extended Data Fig.** **5. zCD9 knockout significantly attenuates VHSV infection.** (**a**) CRISPR-Cas9 target sequence for zebrafish CD9 (zCD9) knockout. (**b**) Morphology of CD9-knockout (zCD9-/-) zebrafish at 5 days post-fertilization. (**c**) Histological sections of intestine and liver from wild-type (WT) or zCD9-/- zebrafish infected with VHSV. Bar=100 μm. (**d**) RT-qPCR analysis of VHSV *G* mRNA level in WT or zCD9-/- zebrafish infected with VHSV. **, *p*＜0.01. (**e-f**) RT-qPCR quantification of VHSV *M* (**e**) and *N* (**f**) mRNA in WT or zCD9-/- zebrafish cells at 4, 12, and 24 h post-VHSV infection. **, *p*＜0.01. (**g-h**) RT-qPCR analysis of VHSV *M* (g) and *N* (h) mRNA in WT or zCD9-/- zebrafish cells transfected with Flag or Flag-LjCD9 (to rescue CD9 expression) and infected with VHSV for 24 h. **, *p*＜0.01. Data are mean ± SEM, representative of three independent experiments.

### Extended Data Fig. 6


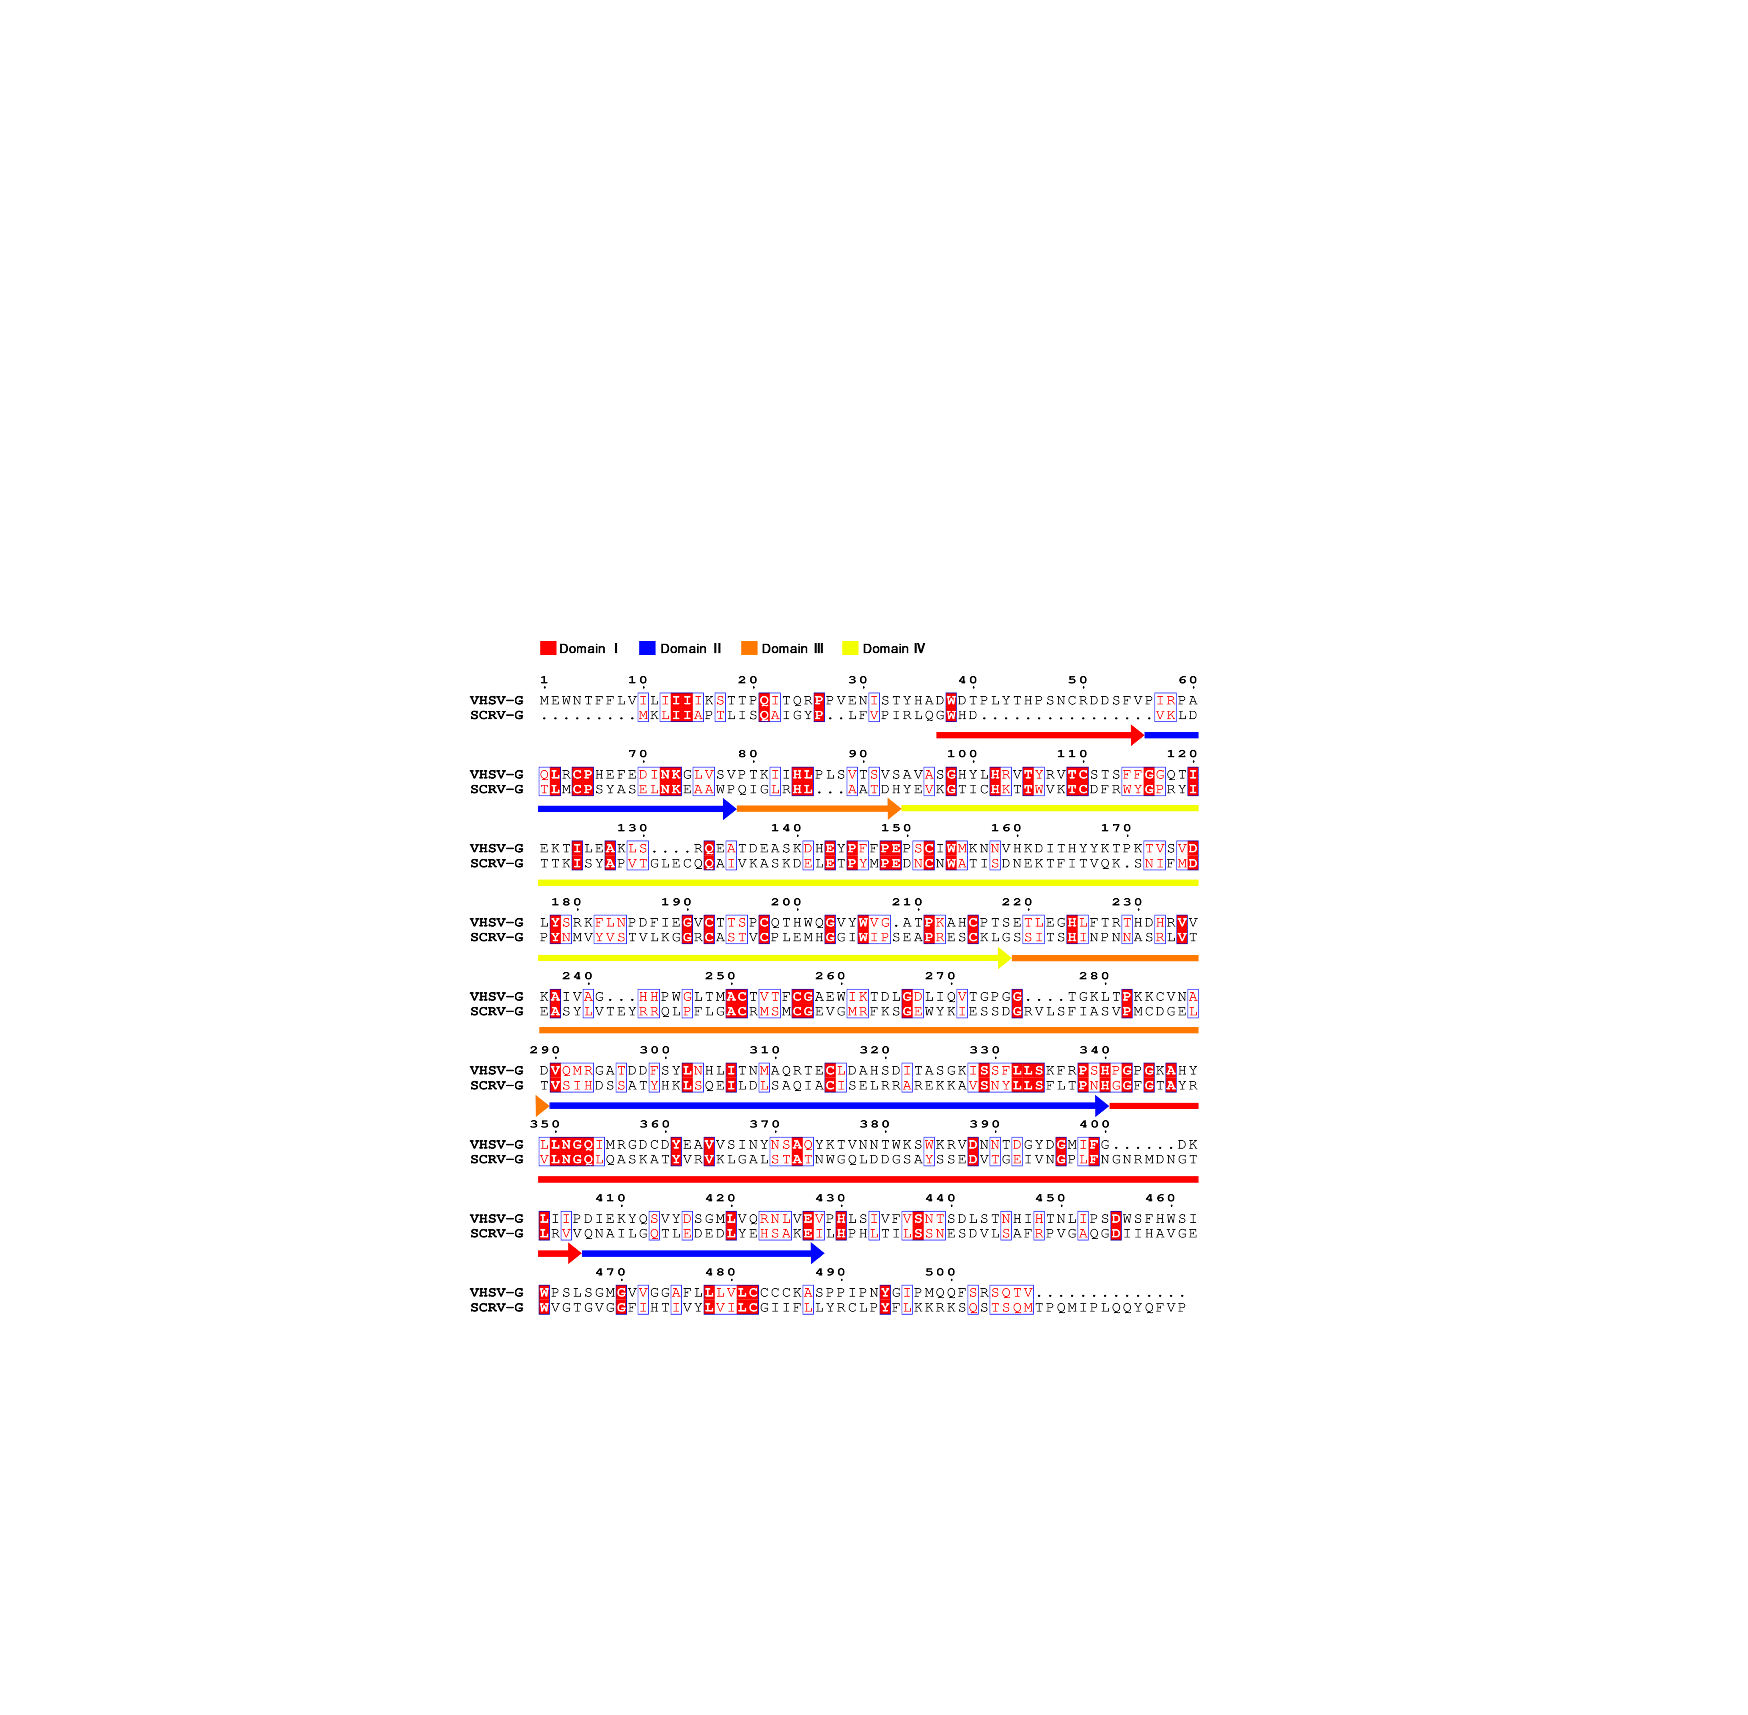


**Extended Data Fig. 6. G protein sequence alignment of VHSV and SCRV.** The G proteins of VHSV and SCRV were divided into four domains and labeled in different colors. Sequence alignment of these G proteins was performed using MEGA-X and visualized with ENDscript 2, enabling comparative analysis of their molecular features and potential functional regions.

### Extended Data Fig. 7


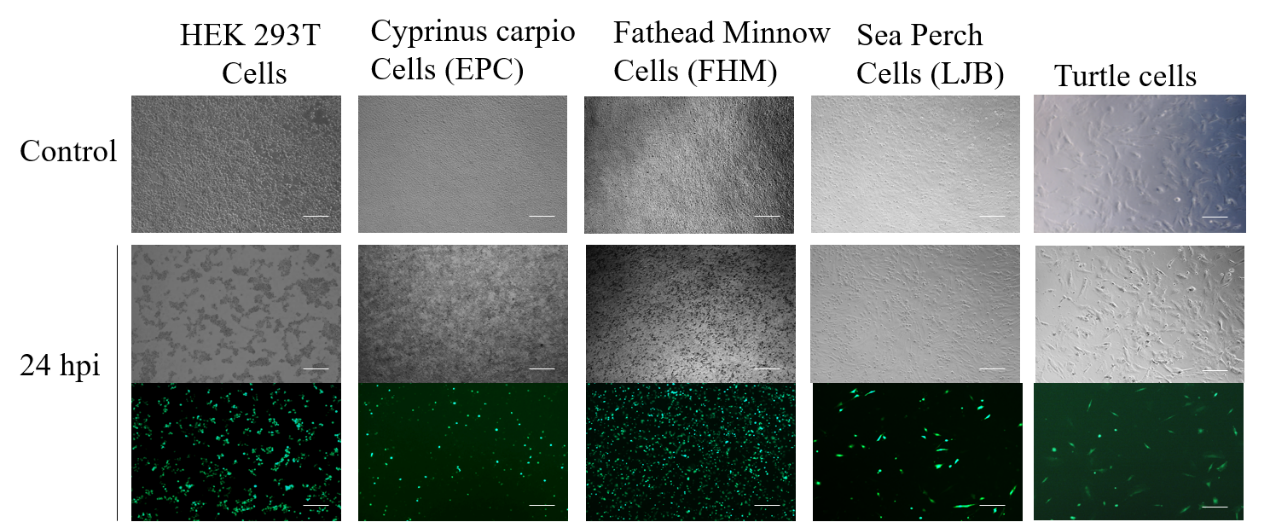


**Extended Data Fig. 7.** **Viral susceptibility of fish and turtle cells to VSV infection.** Cytopathic effects and fluorescence images of different fish cells (EPC, FHM and LJB) and turtle cells infected with presudotyped-VSV (GFP) for 24 h. HEK293T cells were infected as positive control, respectively. Bar=10 μm.

### Extended Data Fig. 8


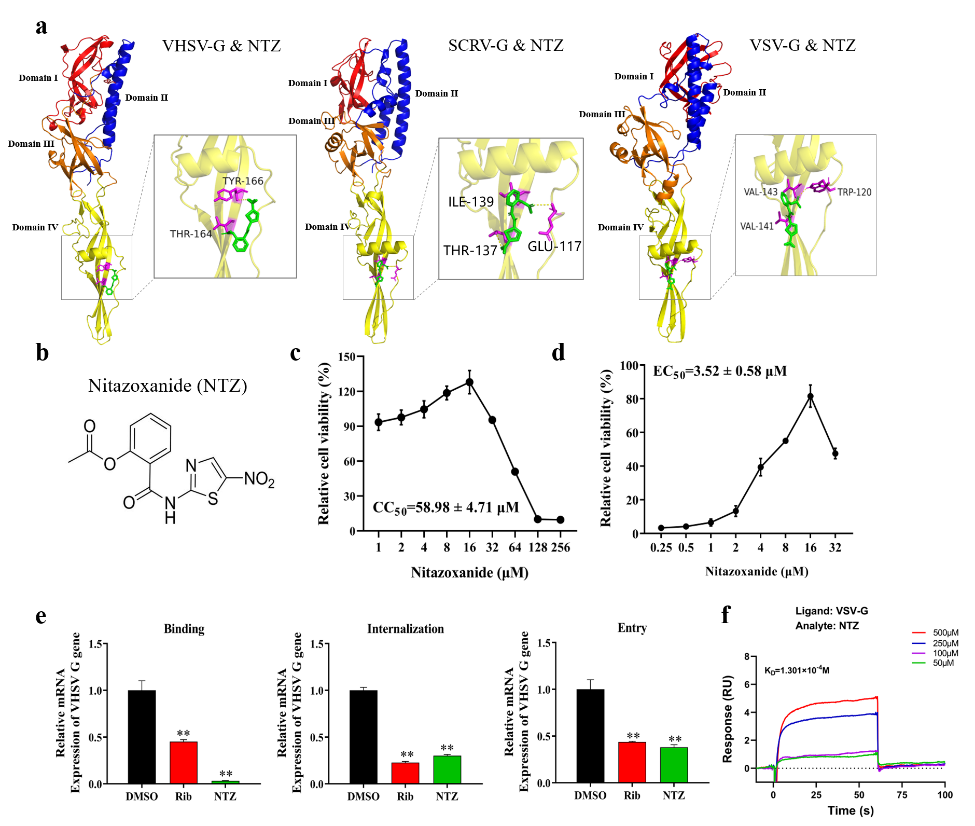


**Extended Data Fig. 8. Characterization of nitazoxanide (NTZ) activity in LJB cells.** (**a**) Molecular docking analysis of NTZ binding to VHSV G, SCRV G, and VSV G. AutoDock Vina was used to predict interaction modes; left panels show overall binding conformations, and right panels highlight interacting domains and key residues. (**b**) Structural formula of NTZ. (**c**) Cytotoxicity assay of NTZ in LJB cells. CC₅₀ was determined by treating cells with serial NTZ concentrations for 48 h followed by cell viability assessment. (**d**) Antiviral efficacy assay of NTZ against VHSV. EC₅₀ was calculated by infecting LJB cells with VHSV (MOI=5.2×10⁻³), treating with NTZ, and measuring viability at 48 hpi. (**e**) Kinetics of NTZ inhibition on VHSV binding, internalization, and entry. LJB cells were treated with NTZ, ribavirin (Rib, positive control), or DMSO (NC) at different time points post-infection, and VHSV *G* expression was analyzed by RT-qPCR. **, *p*＜0.01. (**f**) SPR analysis of direct binding between VSV G and NTZ. VSV G protein was coupled to a CM5 chip, and NTZ was passed at the indicated concentrations. Data are representative of three independent experiments.

### Extended Data Fig. 9


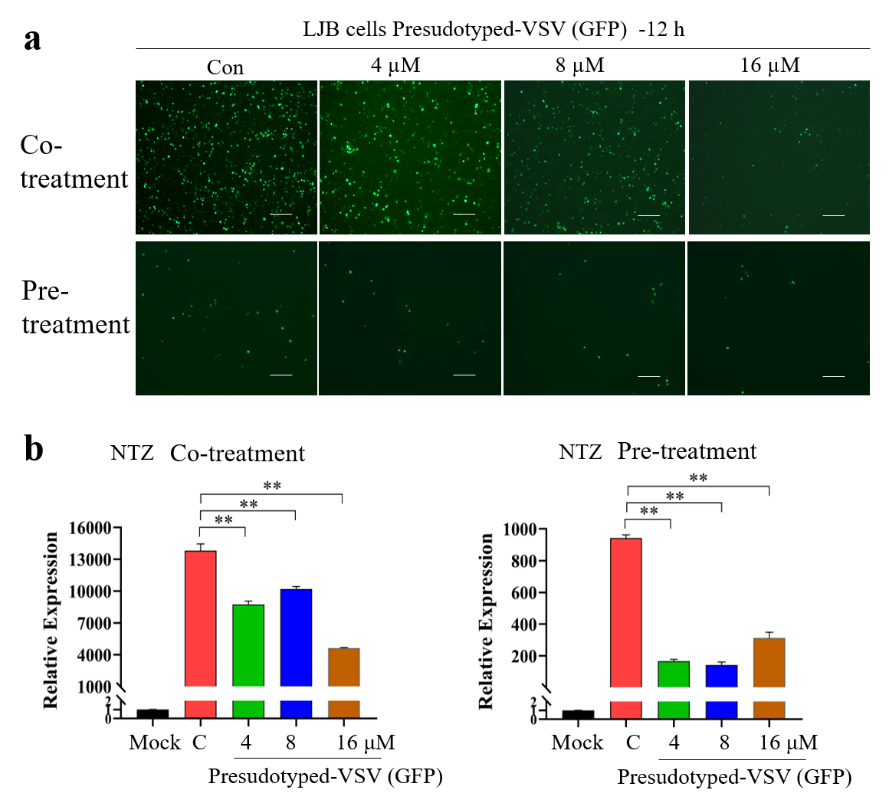


**Extended Data Fig. 9. NTZ exhibits potent antiviral activity against VSV.** (**a-b**) Inhibitory effects of NTZ on VSV infection in LJB cells. LJB cells were treated with dose-dependent NTZ and presudotyped-VSV (GFP) (co-exposure), or pre-incubated with dose-dependent NTZ for 3 h, followed by presudotyped-VSV (GFP) infection (pre-incubation) for 12 h, the cells were subjected to fluorescence examination (**a**) and analyzed for VSV *G* gene expression using RT-qPCR (**b**), **, *p*＜0.01, Bar=10 μm.

### Extended Data Fig. 10


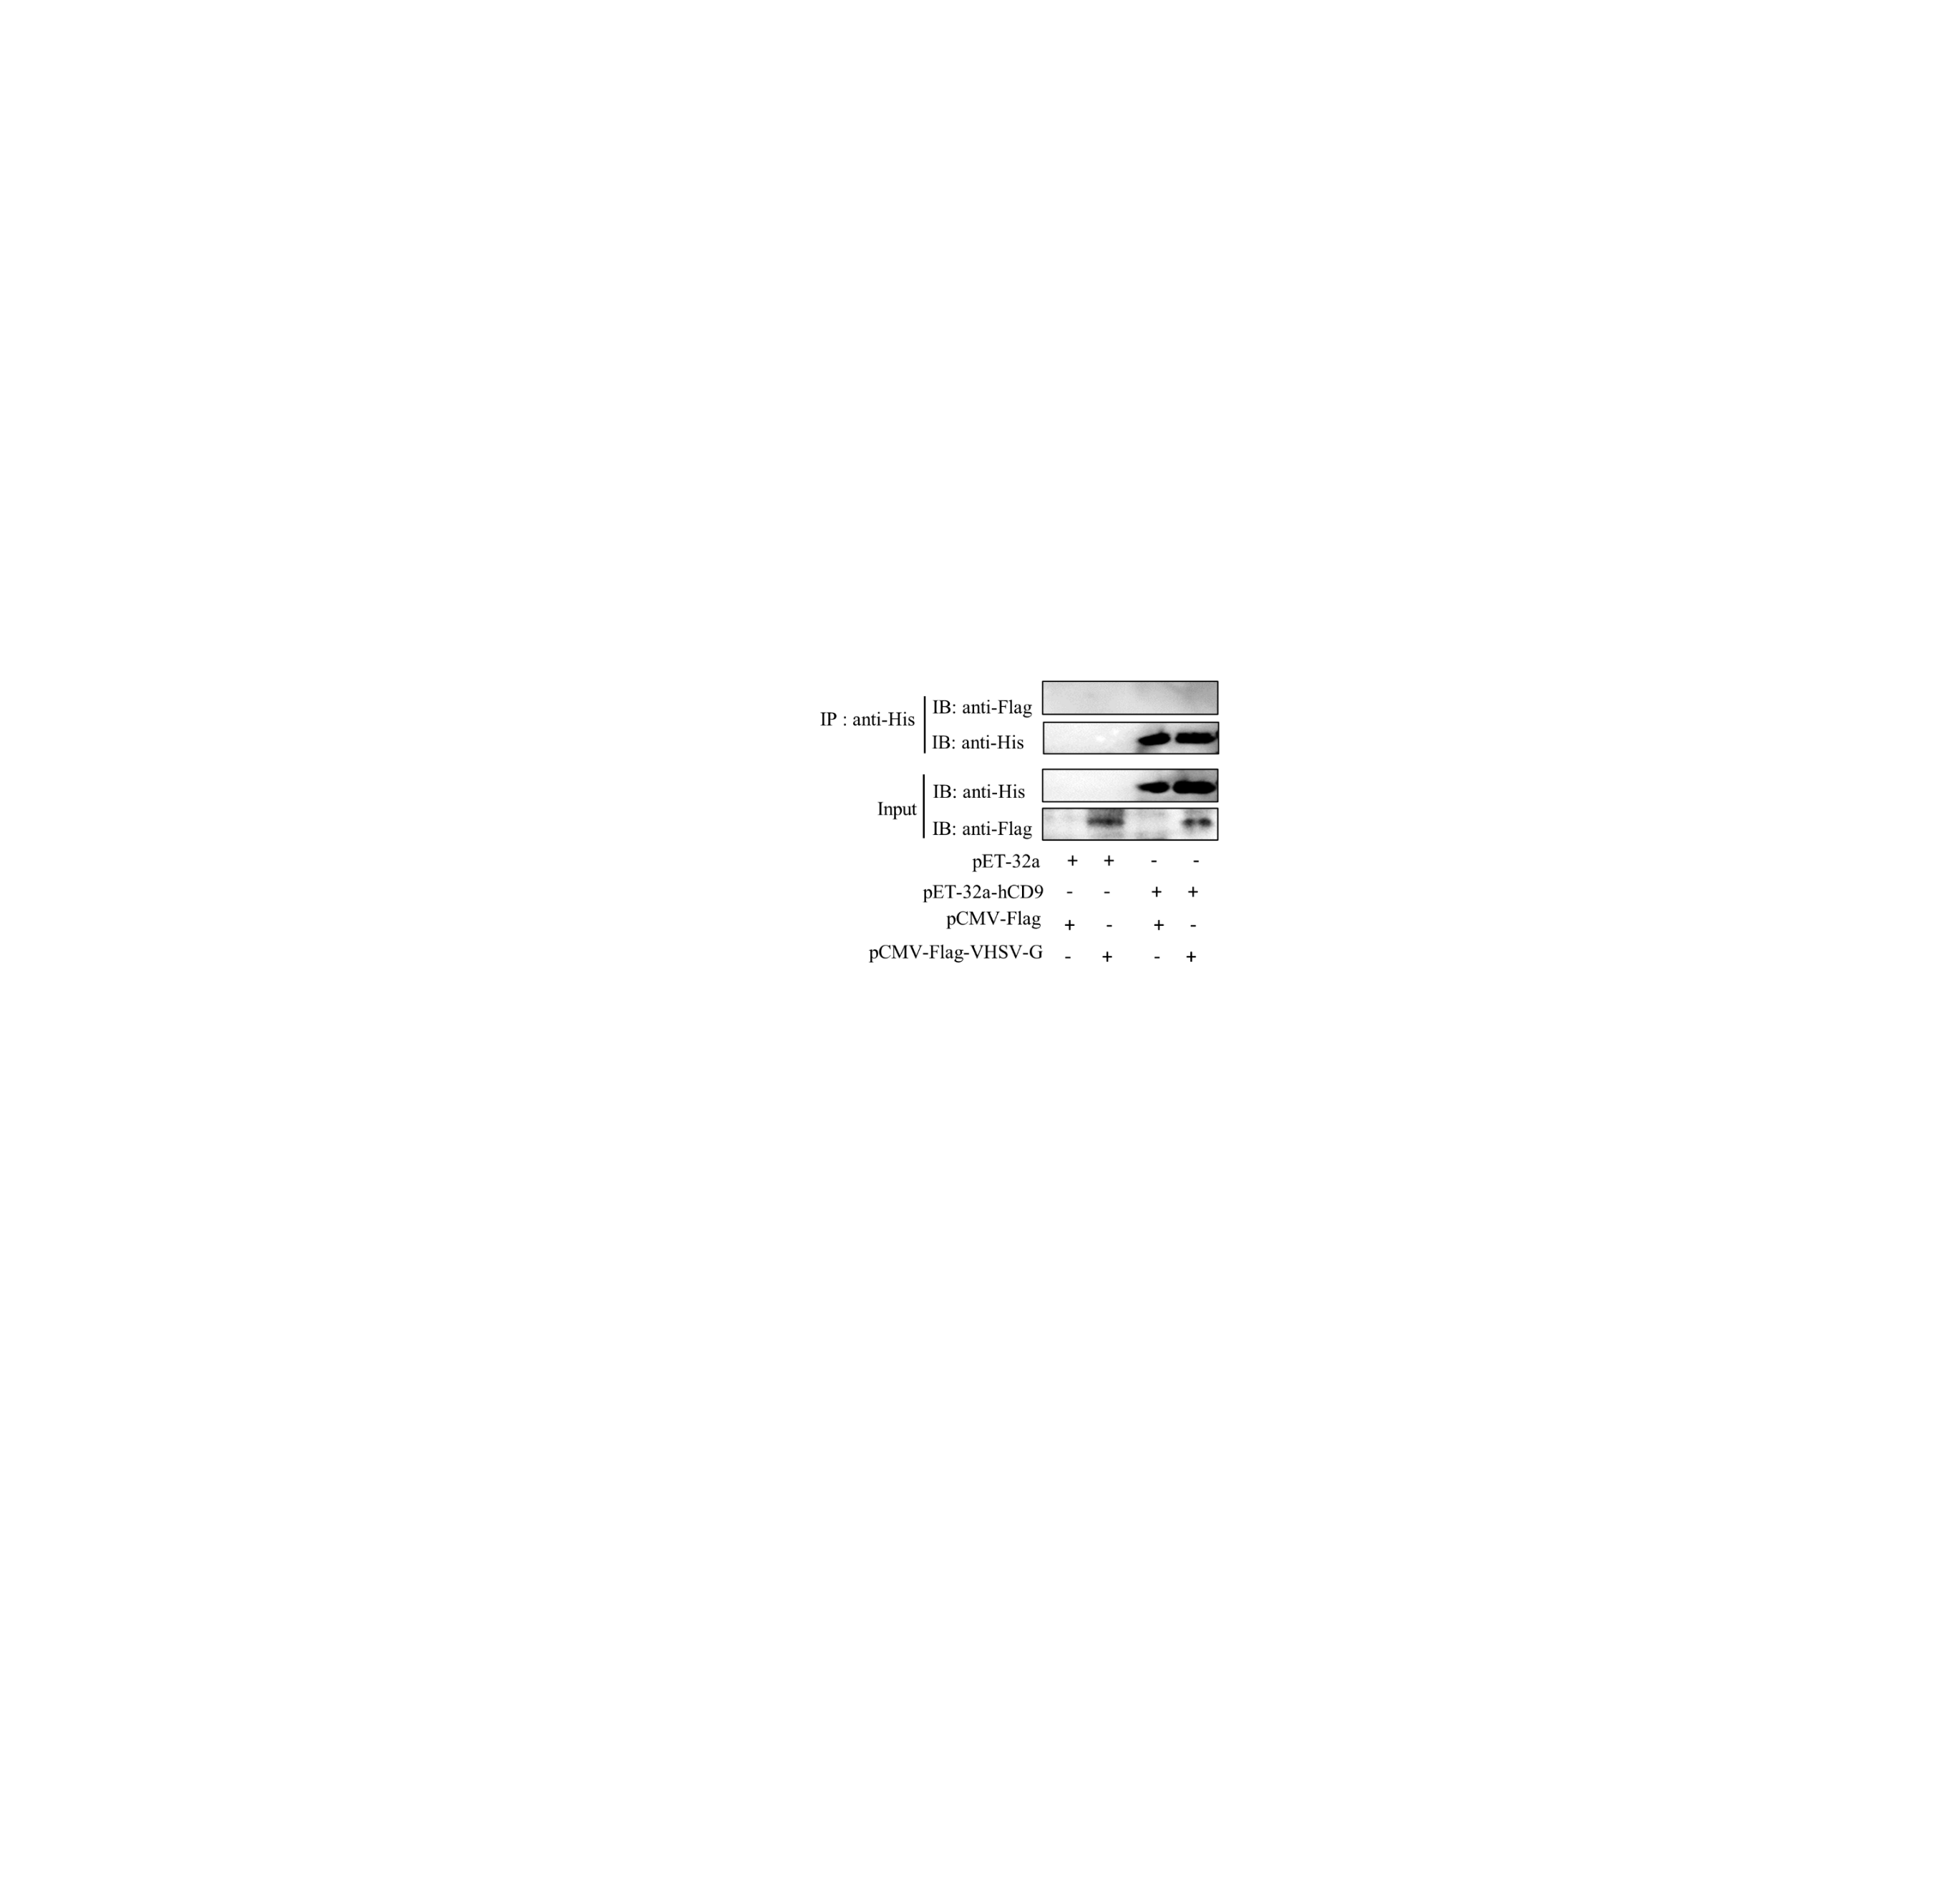


**Extended Data Fig. 10.** VHSV G did not interact with hCD9. The lysates of HEK293T cells transfected with indicated plasmids were pulled down with purified His-hCD9 or His proteins using anti-His magnetic beads, and immunoblotted with anti-His and anti-Flag antibodies.
