# Supplementary material for: Tetraspanin CD9 is a conserved receptor for rhabdoviruses across multiple genera
Source: Research Square preprint supplement (doi:10.21203/rs.3.rs-7515469/v1), 2025-09-18
Supplement: Supplementary file 2 [file 51c9747d1ffb23b06efefd6c.xlsx]

## Sheet: sheet1
Table S1. The sequence of primers used in this study.
Primer	5’ Sequences	3’ Sequences
Flag-VHSV-G	CGGAATTCCGATGGAATGGAATACTTTTTTCTT	CGGGGTACCTCAGACCATCTGGCTTCTG
VHSV-N-qpcr	TTGGAGAACTGCAACACTTCAC	CGGTCAGGATGAAGGCGTAG
VHSV-G-qpcr	CTATGACAGCGGAATGCTCGT	TCTGAAGGAATTAGATTGGTGTG
VHSV-M-qpcr	CTATTCCAGAGTGCCATGATCT	TATGCGAGACCTCACTGGACT
VHSV-P-qpcr	CAAGGACACCAGATCAGCTCT	TGGCATCCAGTTGAAGATCTTC
GFP-VHSV-G-F	GGGGTACCATGGAATGGAATACTTTTTTCTTGGT	GGGGTACCATGGAATGGAATACTTTTTTCTTGGT
Myc-VHSV-G-ΔⅠ（57-340 aa）	CTTATGGCCATGGAGGCCCGAATTCGGCCAGATCAACTCAG	GATGTCGTGACTAGGACGAAA
Myc-VHSV-G-ΔⅠ（407-507 aa）	AGTCACGACATCGAGAAATAC	GATCCCCGCGGCCGCGGTACCTAGACCATCTGGCTTCTGGAGA
Myc-VHSV-G-ΔⅡ（1-56 aa)	CTTATGGCCATGGAGGCCCGAGAATGGAATACTTTTTTCTT	TGGGACCGGAACAAAGGAGTC
Myc-VHSV-G-ΔⅡ（78-289 aa)	GTTCCGGTCCCAGCCCAGATC	CCCCGGGTCGGTGTTGACACA
Myc-VHSV-G-ΔⅡ（341-406 aa)	ACCGACCCGGGGCCGGGCAAG	GATCCCCGCGGCCGCGGTACCTATGGGATGATCAACTTGTCCC
Myc-VHSV-G-ΔⅢ（1-77 aa）	CTTATGGCCATGGAGGCCCGAGAATGGAATACTTTTTTCTT	TGCTGAAGAGACCAAGCCCTT
Myc-VHSV-G-ΔⅢ（93-218 aa）	GTCTCTTCAGCAGTCGCAAAT	CTGAACTGAGGTCGGGCAATG
Myc-VHSV-G-ΔⅢ（290-507 aa）	ACCTCAGTTCAGATGAGGGGA	GATCCCCGCGGCCGCGGTACCTAGACCATCTGGCTTCTGGAGA
Myc-VHSV-G-Ⅳ（1-92 aa）	CTTATGGCCATGGAGGCCCGAGAATGGAATACTTTTTTCTT	TGTTTCGACGCTGGTGACTGA
Myc-VHSV-G-Ⅳ（219-507 aa）	AGCGTCGAAACACTTGAGGGG	GATCCCCGCGGCCGCGGTACCTAGACCATCTGGCTTCTGGAGA
His-VHSV-G	CCCAAGCTTGGGAATGGAATACTTTTTTCTT	CCGCTCGAGGGACCATCTGGCTTCTGGAGA
Flag-LjCD9	CGGAATTCGGATGGCTGCGCTGTCGGGAG	CCGCTCGAGTTACACCACTTCCCGAGACTT
Flag-LjCD9-Δin	CTTATGGCCATGGAGGCCCGAGACCCAAAGACCAAAGGCCT	GATCCCCGCGGCCGCGGTACTTAGCACAGGAGCATGCTAAAGA
Flag-LjCD9-Δout	CTTATGGCCATGGAGGCCCGAGCTGCGCTGTCGGGAGGAGA	GATCCCCGCGGCCGCGGTACTTAAAAACCCCGGATTCCAG
His-LjCD9-Δin	CCCAAGCTTGGGACCCAAAGACCAAAGGCCT	CCGCTCGAGG TTA GCA CAG GAG CAT GCT AAA GA
His-LjCD9-Δout	CCCAAGCTTGG GCTGCGCTGTCGGGAGGAGA	CCGCTCGAGG TTA AA AAC CCC GGA TTC CAG
GST-LjCD9	TCCAGCTTCTGCAGGAATTCGCTGCGCTGTCGGGAGGAGA	AGCAGCCGGATCTCACTCGAGTTACACCACTTCCCGAGACTTCC
Flag-HmCD9	CTTATGGCCATGGAGGCCCGACCGGTCAAAGGAGGCACCAA	GATCCCCGCGGCCGCGGTACCTAGACCATCTCGCGGTTCC
His-HmCD9	CTGATATCGGATCCGAATTCATGCCGGTCAAAGGAGGCAC	TCGAGTGCGGCCGCAAGCTTCTAGACCATCTCGCGGTTCC
Flag-HmCD9-Δout	CTTATGGCCATGGAGGCCCGACCGGTCAAAGGAGGCACCAA	GATCCCCGCGGCCGCGGTACCTATCCCCAGATGGCCGCAGCTAT
Flag-HmCD9-Δin	CTTATGGCCATGGAGGCCCGACTGCTGTTCGGATTTAACTTC	GAT CCC CGC GGC CGC GGT AC CTA CAA GAT CAT ACT GAA GAT CAT
Flag-SCRV-G	CGGAATTCCGATGAAATTGATCATTGCACTTAC	CGGGGTACCTTAGGGAACAAATTGATACTGC
SCRV-Matrixprotein-qpcr	CGGTTGCCATCTCTTATGA	CCTCTGCTTCTGCTATCTG
SCRV-Nucleoprotein-qpcr	TCGCATCATTCACTGGATT	TGGCAGAGTAAGGAGACA
SCRV-Phosphoprotein -qpcr	ACAGCAGAGGTCTCAAGA	ATTAGCATCCGCAGAAGG
VSV-N-qpcr	AGCAAGGAATGCCCGACA	GCATTAGTCGTCAATCCTCCG
VSV-P-qpcr	CCCAGTGGCTTTCGACGAT	TGATTGGGACGGATGTGTGTT
Flag-VSV-G	CGGAATTCCGATGGAATGGAATACTTTTTTCTT	CGGGGTACCTCAGACCATCTGGCTTCTG
EcoRI-Cav1	CGGAATTCGGATGACAGGAGAACTGAAGGACG	GGGGTACCCTACACCTCCTTGCTTGTGCG
EcoRI-AP2	CGGAATTCGGATGATCGGAGGACTCTTCATCT	CCGCTCGAGTCAGCAGCGTGTTTCGTAGAT
β-actin-qpcr-F	GGAGCACCCAGTCCTGCTC	TGGTACGACCAGAGGCATACA
